# Supplementary material
Source: PubMed Central journal article supplement (PMC7260690)
Supplement: jamaoncol-6-1271-s001.pdf [file jamaoncol-6-1271-s001.pdf]

## Supplementary Online Content

Agarwal A, Roberts A, Dusetzina SB, Royce TJ. Changes in opioid prescribing patterns among generalists and oncologists for Medicare Part D beneficiaries from 2013 to 2017. *JAMA Oncol*. Published online May 29, 2020. doi:10.1001/jamaoncol.2020.2211

**eTable.** Poisson Regression—Estimated Adjusted Incidence Rate Ratios by Opioid Prescribing Rate Outcome and Specialty

This supplementary material has been provided by the authors to give readers additional information about their work.

## SUPPLEMENTAL MATERIALS

**Supplemental Table 1: Poisson Regression–Estimated Adjusted Incidence Rate Ratios by Opioid Prescribing Rate Outcome and Specialty**

|                                  | Opioid prescriptions/<br>100 Medicare beneficiaries |        |          | LA opioid prescriptions/<br>100 Medicare beneficiaries |        |          |
|----------------------------------|-----------------------------------------------------|--------|----------|--------------------------------------------------------|--------|----------|
|                                  | aIRR                                                | 95% CI |          | aIRR                                                   | 95% CI |          |
| <b>Generalists</b>               |                                                     |        |          |                                                        |        |          |
| Year                             |                                                     |        |          |                                                        |        |          |
| 2013                             | Reference                                           |        |          | Reference                                              |        |          |
| 2014                             | 0.936                                               | (0.934 | , 0.939) | 0.928                                                  | (0.921 | , 0.935) |
| 2015                             | 0.858                                               | (0.854 | , 0.862) | 0.849                                                  | (0.840 | , 0.858) |
| 2016                             | 0.798                                               | (0.793 | , 0.802) | 0.768                                                  | (0.758 | , 0.778) |
| 2017                             | 0.730                                               | (0.725 | , 0.734) | 0.672                                                  | (0.662 | , 0.682) |
| Female                           | 0.753                                               | (0.745 | , 0.761) | 0.727                                                  | (0.710 | , 0.745) |
| Medicare patient age             | 0.978                                               | (0.976 | , 0.979) | 0.965                                                  | (0.961 | , 0.969) |
| Medicare patient risk score      | 0.869                                               | (0.861 | , 0.877) | 1.035                                                  | (1.015 | , 1.055) |
|                                  |                                                     |        |          |                                                        |        |          |
| <b>Oncologists</b>               |                                                     |        |          |                                                        |        |          |
| Year                             |                                                     |        |          |                                                        |        |          |
| 2013                             | Reference                                           |        |          | Reference                                              |        |          |
| 2014                             | 0.954                                               | (0.943 | , 0.965) | 0.957                                                  | (0.937 | , 0.976) |
| 2015                             | 0.877                                               | (0.864 | , 0.889) | 0.902                                                  | (0.879 | , 0.925) |
| 2016                             | 0.820                                               | (0.806 | , 0.834) | 0.817                                                  | (0.793 | , 0.843) |
| 2017                             | 0.755                                               | (0.741 | , 0.770) | 0.716                                                  | (0.692 | , 0.741) |
| Female                           | 0.875                                               | (0.852 | , 0.899) | 0.903                                                  | (0.864 | , 0.944) |
| Mean Medicare patient age        | 0.948                                               | (0.943 | , 0.953) | 0.940                                                  | (0.932 | , 0.948) |
| Mean Medicare patient risk score | 1.226                                               | (1.187 | , 1.265) | 1.316                                                  | (1.251 | , 1.385) |

Note: LA=Long acting; aIRR=Adjusted incidence rate ratio; CI=Confidence interval. Poisson regression for each opioid prescribing rate outcome were estimated using Poisson regression on prescriber-level data with standard errors clustered on prescriber. All models controlled for state fixed effects.
